# Supplementary material
Source: PubMed Central journal article supplement (PMC5603256)
Supplement: NIHMS867101-supplement.pdf [file NIHMS867101-supplement.pdf]

## Appendix

### *Calculation of Percent Deviation from Homogeneity*

Areas of functional defect were identified as regions with ventilation values below a calculated cutoff. The calculation of the cutoff value is based on a percent deviation from an ideal, homogeneous functional distribution within the lung. The theoretical ventilation value that corresponds to perfectly homogenous functionality is a mean of the average ventilation value in six lung regions, divided superior to inferior into thirds for both the left and right lung. The cutoff at which defects were identified is given in Equation A.1.

$$V_T = \left(\frac{100}{6}\right) \left(\frac{100-x}{100}\right) \sum_{i=1}^6 V_{ave,i} \quad (\text{A.1})$$

Where  $x$  is the percent reduction from homogeneous function, and  $V_{ave,i}$  is the average ventilation value of the  $i$ th third. All voxels with ventilation values greater than  $V_T$  were classified as functional lung and included in the functional lung contour used to calculate functional dose metrics.

Mathematically the values for  $x$  can span +100% to -500%. Realistically the range is much more limited as it is unlikely that all of a patient's ventilation occurs within a highly localized region ( $x = -500\%$ ) and in the limit that  $x$  approaches +100%, metrics would be derived for the entire lung and be equivalent to standard lung planning dose metrics. As an example, an input value of -50% would produce a ventilation threshold equal to 1.5 times theoretically homogeneous value. Likewise, an input of +50% means that the threshold value for identifying functional lung would be one half of the theoretically homogeneous value. In other words, in the

latter case, all areas of the lung with ventilation values greater than 0.5 times the homogeneous ventilation value would be binned to the functional contour.

*Modeling Results for Grade 2+ Radiation Pneumonitis*

| <b>Grade 2+ Pneumonitis</b> |                |                    |                |                             |
|-----------------------------|----------------|--------------------|----------------|-----------------------------|
| <b>Model</b>                | <b>Metrics</b> | <b>Maximum AUC</b> | <b>p-Value</b> | <b>Threshold</b>            |
| <b>Percentile</b>           | V20Gy          | 0.73               | <0.01          | 86 <sup>th</sup> Percentile |
|                             | Mean           | 0.73               | <0.01          | 69 <sup>th</sup> Percentile |
| <b>Percent Deviation</b>    | V20Gy          | 0.73               | <0.01          | -50                         |
|                             | Mean           | 0.73               | <0.01          | -15                         |
| <b>Total Lung</b>           | V20Gy          | 0.55               | 0.36           | N/A                         |
|                             | Mean           | 0.58               | 0.12           | N/A                         |

**Table A.1:** The predictive power (AUC) and significance of fit (p-Values) for NTCP models using different functional sub-volumes is presented for Grade 2+ radiation pneumonitis. For comparison, the normal means of evaluating lung dose from the total lung is reported for the examined patient cohort.

| <b>Grade 2+ Pneumonitis</b> |               |            |                |
|-----------------------------|---------------|------------|----------------|
| <b>Model</b>                | <b>Metric</b> | <b>AUC</b> | <b>p-Value</b> |
| <b>DFH</b>                  | F10Gy         | 0.70       | 0.02           |
| <b>Sigmoidal Weighting</b>  | F20Gy         | 0.74       | <0.01          |
| <b>Total Lung</b>           | V20Gy         | 0.55       | 0.36           |
|                             | Mean          | 0.58       | 0.12           |

**Table A.2:** The predictive power (AUC) and significance of fit (p-Values) for NTCP models using different dose function histogram calculations is presented for Grade 2+ radiation pneumonitis. For comparison, the normal means of evaluating lung dose from the total lung is reported for the examined patient cohort.

*Calculating the Dose-Function of Interest for Different Structure-Based Thresholds*

| <b>Grade 3+ Pneumonitis</b> |            |                |               |
|-----------------------------|------------|----------------|---------------|
| <b>Threshold</b>            | <b>AUC</b> | <b>p-Value</b> | <b>Metric</b> |
| <b>Total Lung</b>           | 0.55       | 0.290          | Mean          |
| <b>5th</b>                  | 0.58       | 0.160          | V30Gy         |
| <b>10th</b>                 | 0.61       | 0.111          | V30Gy         |
| <b>15th</b>                 | 0.63       | 0.076          | V30Gy         |
| <b>20th</b>                 | 0.64       | 0.055          | V30Gy         |
| <b>25th</b>                 | 0.65       | 0.044          | V20Gy         |
| <b>30th</b>                 | 0.66       | 0.036          | V20Gy         |
| <b>35th</b>                 | 0.66       | 0.032          | V20Gy         |
| <b>40th</b>                 | 0.67       | 0.029          | V20Gy         |
| <b>45th</b>                 | 0.67       | 0.027          | V20Gy         |
| <b>50th</b>                 | 0.68       | 0.035          | V30Gy         |
| <b>55th</b>                 | 0.68       | 0.024          | V20Gy         |
| <b>60th</b>                 | 0.68       | 0.023          | V20Gy         |

|             |      |       |       |
|-------------|------|-------|-------|
| <b>65th</b> | 0.69 | 0.021 | V20Gy |
| <b>70th</b> | 0.69 | 0.020 | V20Gy |
| <b>75th</b> | 0.68 | 0.021 | V20Gy |
| <b>80th</b> | 0.69 | 0.024 | V20Gy |
| <b>85th</b> | 0.70 | 0.033 | V20Gy |
| <b>90th</b> | 0.68 | 0.062 | V20Gy |
| <b>95th</b> | 0.66 | 0.110 | V20Gy |

**Table A.3:** The dose metric providing the highest predictive power (AUC) for structure-based modeling is reported for different functional cutoff thresholds. The functional cutoff thresholds used were based on a percentile image of the ventilation values. For example, the 90<sup>th</sup> percentile would treat the top 10% of all ventilation values as the functional sub-volume used for analysis.

*Model Parameters for Non-Linear Weighting*

| <b>Pneumonitis Grade</b> | <b>Dose-Function Metric</b> | <b><math>h_c</math></b> | <b><math>m</math></b> | <b>AUC</b> | <b>p-Value</b> |
|--------------------------|-----------------------------|-------------------------|-----------------------|------------|----------------|
| <b>Grade 2+</b>          | F20Gy                       | 0.3                     | 8                     | 0.74       | <0.01          |
| <b>Grade 3+</b>          | F20Gy                       | 0.2                     | 8                     | 0.67       | 0.03           |

**Table A.4:** The model parameters for the sigmoidal weighting of ventilation values prior to DFH calculation are presented. These parameters provided the highest predictive power (as determined by AUC) while maintaining significance (p-Value < 0.05) with respect to predicting Grade 2+ and Grade 3+ radiation pneumonitis. Also presented are the dose-function metrics which provided the highest predictive power for the model. The parameter  $h_c$  corresponds to the relative position of the sigmoid and the parameter  $m$  represents the slope of the central region.

|             | Dose-Function Metric |         |       |         |       |         |       |         |           |         |
|-------------|----------------------|---------|-------|---------|-------|---------|-------|---------|-----------|---------|
|             | V5Gy                 |         | V10Gy |         | V20Gy |         | V30Gy |         | Mean Dose |         |
| Method      | AUC                  | p-Value | AUC   | p-Value | AUC   | p-Value | AUC   | p-Value | AUC       | p-Value |
| % Deviation | 0.55                 | 0.78    | 0.60  | 0.25    | 0.70  | 0.02    | 0.68  | 0.02    | 0.66      | 0.04    |
| Percentile  | 0.55                 | 0.61    | 0.59  | 0.35    | 0.70  | 0.03    | 0.68  | 0.03    | 0.66      | 0.06    |

**Table A.5:** The highest AUCs and associated p-values are presented for all the structure-based dose-function metrics examined in the study.

|                         | Dose-Function Metric |         |       |         |       |         |       |         |
|-------------------------|----------------------|---------|-------|---------|-------|---------|-------|---------|
|                         | F5Gy                 |         | F10Gy |         | F20Gy |         | F30Gy |         |
| Method                  | AUC                  | p-Value | AUC   | p-Value | AUC   | p-Value | AUC   | p-Value |
| DFH                     | 0.48                 | 0.92    | 0.54  | 0.55    | 0.66  | 0.04    | 0.66  | 0.04    |
| Non-Linear<br>Weighting | 0.53                 | 0.75    | 0.57  | 0.39    | 0.67  | 0.03    | 0.65  | 0.04    |

**Table A.6:** The highest AUCs and associated p-values are presented for all the image-based dose-function metrics examined in the study.
